# Supplementary material
Source: Springer Nature journal article supplement (https://www.springermedizin.de/resource/supplementary/12990_2010_306_MOESM10_ESM.pdf/9612994)

A (MS/CI)

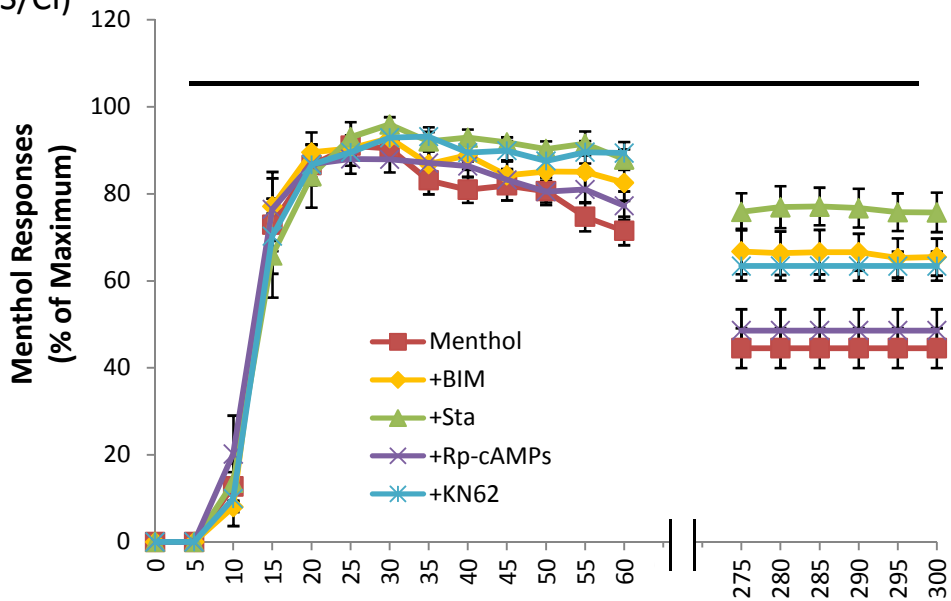

B (MS/CS)

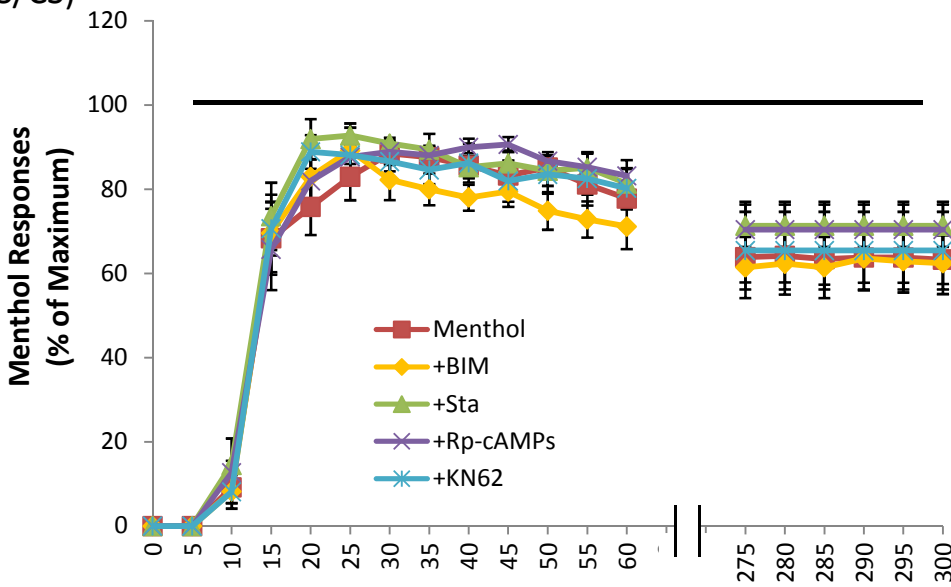

Supplement: MOESM10 [file 9612994]
